# Supplementary material for: Clinical significance of platelet-to-white blood cell ratio in patients with Wilson disease: a retrospective cohort study
Source: PeerJ. 2025 Apr 29;13:e19379. doi: 10.7717/peerj.19379 (PMC12047222; doi:10.7717/peerj.19379)
Supplement: Supplemental Information 6 [file peerj-13-19379-s006.xlsx]

## Sheet: Sheet1
Patients number	SEX（F=0，M=1）	AGE(YRS)	duration of WD(YRS)	anti-copper therapy	Kayser–Fleischer rings	Hypertension	Type 2 diabetes	Current smoking	Alcoholism	Cirrhosis	Hepatic decompensation	Hepatocellular carcinoma	Ascites	Portal vein thrombosis	SBP	Renal impairment	Hepatic encephalopathy	Liver failure	Esophagogastric varices	Splenomegaly/splenectomy	neurological manifestation	psychiatric manifestation	Portal vein diameter	BMI	PWR	PWR<26.3	ALT	AST	total bilirubin	albumin	triglyceride	total cholesterol	HDL-C	LDL-C	PT	INR	HA	CIV	PⅢNP	LN	24-hour urinary copper levels	Child–Pugh score	Child–Pugh classification B/C
#1	1	24	O	1	0	0	0	0	0	1	0	0	0	0	0	0	0	0	0	1	1	0	11	18.7883	26.3982	0	26	19	9.4	44	0.72	2.99	1.22	1.44	13.5	1.05	37.08	45.18	64.46	106.07	-	5	0
#2	0	49	40	0	1	0	0	0	0	0	0	0	0	0	0	0	0	0	0	1	1	1	13	23.1247	26.4026	0	42	27	7.7	38	1.24	2.89	1.05	1.28	16.1	1.31	134.88	58.48	81.86	77.89	-	5	0
#3	1	13	0	0	0	0	0	0	0	0	0	0	0	0	0	0	0	0	0	0	0	0	0	21.2585	26.5781	0									15.1	1.17	42.12	62.41	127.45	119.8	1761.89
#4	0	14	1	1	0	0	0	0	0	1	0	0	0	0	0	0	0	0	0	1	1	1	10	19.313	26.8199	0	34	43	6.9	37	0.85	5.07	1.95	2.44	15.4	1.2	189.92	49.95	151.35	117.55	255.73	5	0
#5	1	14	5	1	1	0	0	0	0	1	0	0	0	0	0	0	0	0	0	1	1	0	7	20.7967	26.9303	0	81	33	35.4	39	0.77	3.76	0.98	2.43	17.8	1.47	175.92	49.55	154.3	132.64	-	7	1
#6	0	38	4	1	1	0	0	0	0	1	0	0	0	0	0	0	0	0	0	1	0	0	10	20.9366	26.9373	0	26	20	12.6	38	0.62	3.66	1.41	1.97	14.5	1.13	41.39	50.18	60.44	112.87	1169.53	5	0
#7	0	29	17	0	1	0	0	0	0	1	0	0	0	0	0	0	0	0	0	1	0	0		19.6072	27.0572	0	40	37	18.4	40.7	0.77	4.66	1.68	2.63	13.8	1.07	66.81	52.41	41.55	97.41		5	0
#8	1	35	8	1	0	0	0	0	0	1	0	0	0	0	0	0	0	0	0	0	1	0		22.4913	27.4247	0	23	19	20.1	39	0.39	4.25	1.45	2.62	14.6	1.15	35.76	51.42	55.47	120.52	105.46	5	0
#9	1	30	12	1	0	0	0	0	0	1	0	0	0	0	0	0	0	0	0	1	1	0	12	19.3337	27.5304	0	24	28	5.5	41	4.42	4.82	1.02	2.63	12.9	0.97	69.21	45.85	93.98	97.03	-	5	0
#10	1	27	8	0	0	0	0	0	0	1	0	0	0	0	0	0	0	0	0	1	1	0	9	18.75	27.5701	0	21	13	18.1	36.2					14.4	1.14	91.03	65.61	108.68	121.92	893.87	5	0
#11	0	37	15	1	0	0	0	0	0	0	0	0	0	0	0	0	0	0	0	0	1	0		23.833	27.6169	0	14	10	8.8	35	0.86	3.31	1.03	1.89	12.7	0.97					-	6	0
#12	1	31	9	1	0	0	0	1	0	1	0	0	0	0	0	0	0	0	0	1	1	0	13	22.46	27.6923	0	20	30	24.1	39	0.8	4.26	1.14	2.76	13.9	1.07	43.7	43.16	50.37	96.61	889.45	5	0
#13	0	26	6	1	0	0	0	0	0	1	0	0	0	0	0	0	0	0	0	0	1	0	8	18.1787	27.7132	0	57	21	9.3	42					14.9	1.17					1543.39	5	0
#14	1	17	0	0	0	0	0	0	0	0	0	0	0	0	0	0	0	0	0	0	1	0		20.6612	27.7174	0	28	51	9.9	43	1.63	4.05	1.01	2.3			35.35	57.45	107.69	91.03
#15	0	8	0	1	1	0	0	0	0	1	0	0	0	0	0	0	0	0	0	1	0	0	7	13.44	27.7259	0	61	58	9.4	34.2	0.52	2.78	1.28	1.26	16.2	1.29	135.34	113.79	233.11	141.76	635.2	6	0
#16	1	40	2	1	0	1	0	0	0	1	0	0	0	0	0	0	0	0	0	0	1	0		23.03	27.809	0	10	20	14	42	1.1	3.62	1.01	2.11	14.1	1.09	16.93	41.88	36.59	108.39		5	0
#17	1	22	8	1	0	0	0	0	0	1	0	0	0	0	0	0	0	0	0	1	1	0	11	19.7232	27.9121	0	23	23	6.1	37	0.76	3.3	1.06	1.89	13.8	1.06	66.28	45.05	115.5	100.83	575.62	5	0
#18	1	19	5	1	0	0	0	0	0	1	0	0	0	0	0	0	0	0	0	1	1	0	12	16.7062	28.0303	0	22	30	9	42.3					13.7	1.06	33.34	44.72	84.01	97.83	605.25	5	0
#19	1	37	4	1	1	0	0	1	0	1	0	0	0	0	0	0	0	0	0	1	1	0	14	19.9432	28.2258	0	30	20	11.5	35	0.79	3.93	1.46	1.76	13.5	1.05	190.01	61.91	75.97	117.43	-	6	0
#20	0	29	10	0	0	0	0	0	0	1	0	0	0	0	0	0	0	0	0	0	1	0	10	26.6299	28.3768	0	14	23	8.8	42	0.92	4.92	1.31	3.19	13.6	1.02	29.69	41.57	70.66	95.91	557.38	5	0
#21	0	21	0	1	1	0	0	0	0	1	0	0	0	0	0	0	0	0	0	1	1	0		19.9573	28.4133	0	15	16	16	35.7					14.2	1.11						5	0
#22	1	22	10	1	0	0	0	1	0	1	0	0	0	0	0	0	0	0	0	0	0	1		16.9796	28.4133	0	16	16	13.8	42.3	0.75	3.97	1.36	2.27	13.9	1.06	34.82	53.93	51.99	93.93	？	5	0
#23	1	32	14	1	0	0	0	0	0	1	0	0	0	0	0	0	0	0	0	1	1	0	14	21.9774	28.4946	0	5	12	14.4	43.9					15.5	1.21	122.23	40.72	44.89	81.57		5	0
#24	1	33	0	1	1	0	0	0	0	1	0	0	0	0	0	0	0	0	0	1	0	0	12	19.8413	28.5455	0	34	24	8.7	33.8	1.1	3.32	0.94	1.88	15.8	1.28	125.45	59.73	149.86	129.05	2736.17	6	0
#25	0	17	7	1	1	0	0	0	0	1	0	0	0	0	0	0	0	0	0	1	0	0	7	20.7008	28.6458	0	24	20	10	33	0.97	3.84	1.6	1.8	14.4	1.12	38.59	53.04	146.2	137.03	1607.9	6	0
#26	1	56	9	1	0	0	0	1	0	1	0	0	0	0	0	0	0	0	0	1	1	0		27.8852	28.8998	0	84	55	79.6	29.4	2.19	3.66	0.48	2.18	18.7	1.58	999.12	191.91	199.97	184.88	3826.46	9	1
#27	0	18	3	1	1	0	0	0	0	1	0	0	0	0	0	0	0	0	0	1	1	0	7	19.5312	28.9634	0	17	6	20.1	40	0.71	2.62	1.32	0.98	15.1	1.2	18.13	48.6	87.18	83.62	-	5	0
#28	0	24	3	0	1	0	0	0	0	1	0	0	0	0	0	0	0	0	0	1	1	0	9	31.2394	29.0993	0	25	40	7.9	35.2	1.63	3.84	1.34	1.76	13.4	1.01	74.93	56.63	121.68	77.92	1781.14	5	0
#29	0	10	5	1	0	0	0	0	0	1	0	0	0	0	0	0	0	0	0	0	0	0		16.0229	29.2035	0	25	6	8.9	43	0.98	2.6	1.04	1.11	14.1	1.08	73.91	58.49	156.1	102.19	196.17	5	0
#30	1	28	11	1	0	0	0	0	0	1	0	0	0	0	0	0	0	0	0	0	0	0	11	25.5922	29.2359	0	36	110	25.9	35.6	2.79	5.6	1.1	3.23	14.7	1.17	149.76	29.13	44.32	88.05	1396.15	5	0
#31	0	36	15	1	0	0	0	0	0	1	0	0	0	0	0	0	0	0	0	1	1	0	13	17.9688	29.2683	0	41	58	10.7	34.3	0.89	3.89	1.58	1.91	15	1.19	98.03	69.32	97.39	95.1	826.79	6	0
#32	0	20	6	1	0	0	0	0	0	1	0	0	0	0	0	0	0	0	0	1	0	0	8	20.4382	29.39	0	28	29	8.4	42	1.29	3.53	0.98	1.96	14.2	1.1	20.62	42.87	63.42	108.89	314.6	5	0
#33	1	39	15	1	0	0	0	0	0	1	0	0	0	0	0	0	0	0	0	1	1	0	11	17.4472	29.4118	0	25	23	14	37.7					15.3	1.22	229.87	70.85	84.95	104.22	3054.4	5	0
#34	0	33	13	1	0	0	0	0	0	1	1	0	1	0	0	0	0	0	0	1	1	0	10	19.9219	29.9363	0	87	46	17.3	33.5	0.62	3.36	0.44	2.64	20.7	1.77	458.71	108.04	114.26	151.24	7608.9	9	1
#35	1	21	0	0	0	0	0	0	0	1	0	0	0	0	0	0	0	0	0	0	1	0	12	26.3158	30.0481	0	37	34	25.1	38.3	0.81	3.93	1.33	2.23			50.85	63.98	74.52	102.62
#36	0	27	11	1	0	0	0	0	0	1	0	0	0	0	0	0	0	0	0	0	1	0		17.898	30.2412	0	18	12	13.1	42.6	1.23	4.44	1.62	2.26	14.1	1.1					1789.34	5	0
#37	1	33	23	1	0	1	0	0	0	0	0	0	0	0	0	0	0	0	0	1	0	0	10	22.3094	30.4	0	34	45	7.7	44.6	1.55	4.45	1.23	2.52	12.7	0.97	32.93	56.25	56.26	99.8	273.73	5	0
#38	0	32	16	1	0	0	0	0	0	1	0	0	0	0	0	0	0	0	0	0	0	0		22.7732	30.4511	0	25	16.6	17.2	41.8					14.1	1.08	19.21	37.45	12.61	120.07		5	0
#39	0	21	2	1	0	0	0	0	0	1	0	0	0	0	0	0	0	0	0	0	1	0	10	16.0256	30.5825	0	22	43	9.4	36	0.44	2.91	1.47	1.24	14.5	1.12	145.23	60.04	65.23	111.07	25.14	5	0
#40	1	16	6	1	0	0	0	0	0	0	0	0	0	0	0	0	0	0	0	1	0	0	13	27.4653	30.5958	0	25	45	5.6	44.8	1.17	5.46	1.65	3.28	13	1.01	10.31	49.48	20.22	85.57	2924.7	5	0
#41	0	27	5	1	1	0	0	0	0	0	0	0	0	0	0	0	0	0	0	0	1	0	9	17.8506	30.7359	0	16	8	5.3	40	0.62	3.9	1.52	2.1	13.6	1.04	27.38	35.7	49.79	85.99	855.68	5	0
#42	1	7	2	1	0	0	0	0	0	0	0	0	0	0	0	0	0	0	0	0	0	0	8	19.2044	30.7692	0	57	92	3.9	36					12.4	0.92	27.49	68.57	144.35	119.97	-	5	0
#43	1	24	3	1	0	0	0	0	0	1	0	0	0	0	0	0	0	0	0	1	1	0	14	18.9292	30.7692	0	19.6	23.6	24.8	44.3	0.61	2.91	1.1	1.53	16	1.18	36.42	39.31	72.16	97.24	0	5	0
#44	0	14	0	0	0	0	0	0	0	1	0	0	0	0	0	0	0	0	0	1	1	0		17.7999	30.7914	0	18	35	7.2	61	1.92	4.39	1.17	2.35	13.9	1.07	113.5	56.72	133.46	104.26		5	0
#45	0	12	7	1	1	0	0	0	0	0	0	0	0	0	0	0	0	0	0	0	0	0		19.3835	30.8166	0	23	31	13.7	39	6.13	4.64	1.26	0.59	12.5	0.93	18.12	57.73	105.67	122.84	717.05	5	0
#46	0	17	1	1	1	0	0	0	0	1	0	0	0	0	0	0	0	0	0	0	1	0		20.202	30.9278	0	21.4	21.4	12.2	39.1	0.61	2.92	1.14	1.5	15.3	1.21	61.01	47.39	131.28	107.86		5	0
#47	1	28	16	1	1	0	0	0	0	1	0	0	0	0	0	0	0	0	0	1	1	0	11	18.1449	30.9524	0	103	72	10.7	40					17.1	1.1						6	0
#48	1	32	3	1	0	0	0	0	0	1	0	0	0	0	0	0	0	0	0	1	1	1		19.9184	31.0225	0	19	12	7	41	1.02	4.6	1.59	2.55			93.86	47.95	49.67	118.17
#49	1	19	11	1	0	0	0	0	0	1	0	0	0	0	0	0	0	0	0	1	1	0	11	23.3234	31.04	0	14	22	14.3	37	0.66	3.77	1.29	2.18	13.8	1.07	42.91	62.29	150.84	110.2	-	5	0
#50	1	22	14	1	1	0	0	0	0	1	0	0	0	0	0	0	0	0	0	0	1	1	14	19.6072	31.0714	0	29	30	27.8	42	1.23	4.73	1.5	2.67	13.4	1.04	27.93	45.32	64.83	109.56	-	5	0
#51	0	25	6	1	0	0	0	0	0	1	0	0	0	0	0	0	0	0	0	0	1	1	8	19.8347	31.0949	0	49	32	18	40	1.07	4.4	1.67	2.24			65.21	43.08	68.27	83.61
#52	0	24	8	1	1	0	0	0	0	1	0	0	0	0	0	0	0	0	0	1	1	0	10	25.6821	31.3531	0	23	28	5.5	40	0.92	3.28	0.88	1.98	13.6	1.04	40.01	59.98	90.84	92.32	-	5	0
#53	0	29	21	1	0	0	0	0	0	0	0	0	0	0	0	0	0	0	0	0	1	0	10	23.0469	31.7391	0	17	14	8.4	35	0.55	4.22	1.24	2.73	13.2	1	23.75	45.75	60.02	132.72	272.44	6	0
#54	1	23	13	1	0	0	0	0	0	1	0	0	0	0	0	0	0	0	0	1	1	0	10	18.4672	31.9534	0	40	56	22.75	37	0.65	3.01	0.98	1.73	15	1.18	86.63	53.33	99.95	125.11	-	5	0
#55	1	18	1	1	1	0	0	0	0	0	0	0	0	0	0	0	0	0	0	0	1	0	10	21.4844	32.0117	0	14	30	4.3	48	1.36	6.21	1.56	4.03	14	1.07	37.96	60.41	96.35	105.86		5	0
#56	1	33	25	1	0	0	0	0	0	1	0	0	0	0	0	0	0	0	0	1	0	0	11	23.5666	32.1185	0	27	29	12.4	39.6	1.52	6.31	1.38	4.24	12.9	0.99					372.92	5	0
#57	0	23	20	1	0	0	0	0	0	1	0	0	0	0	0	0	0	0	0	0	0	0		18.4265	32.1293	0	14	5	12.3	38	0.68	4.61	1.67	2.63	14.1	1.09	41.8	52.08	64.92	110.96	-	5	0
#58	0	36	8	1	0	0	0	0	0	1	0	0	0	0	0	0	0	0	0	1	0	0	10	21.79	32.1357	0	22	12	19	37	0.54	3.54	1.09	2.2	14.6	1.14	23.67	40.57	51.39	98.32	410.28	5	0
#59	0	14	5	1	0	0	0	0	0	1	0	0	0	0	0	0	0	0	0	0	0	0		19.8141	32.6007	0	22	23	8.3	40	0.73	4.22	1.62	2.27	13.1	0.99	81.26	64.78	199.33	139.91	385.03	5	0
#60	0	35	4	1	0	0	0	0	0	1	0	0	0	0	0	0	0	0	0	1	1	0	9	17.6478	32.839	0	34	36	6.5	44					15.5	1.23	44.85	31.85	39.75	104.68	-	5	0
#61	0	28	6	0	1	0	0	0	0	1	0	0	0	0	0	0	0	0	0	1	1	0		18.7328	33.0798	0	25	23	10.5	40	0.86	2.38	0.95	1.04	14.7	1.15					179.23	5	0
#62	1	35	7	1	0	0	0	0	0	1	0	0	0	0	0	0	0	0	0	0	0	0		19.6232	33.1066	0	73	80	16.6	43					15.2	1.18					2362.65	5	0
#63	1	23	0	0	0	0	0	0	0	0	0	0	0	0	0	0	0	0	0	0	0	0		18.9388	33.2	0	26	56	21.4	44.5	0.86	4.12	1.44	2.29	14.2	1.11	23.19	51.57	75.95	113.64	＜10	5	0
#64	0	12	0	0	0	0	0	0	0	0	0	0	0	0	0	0	0	0	0	0	0	0			33.3333	0	73	68	8.4	35	0.99	3.26	0.95	1.86	13.9	1.06	59.31	77.38	242.57	106.4	844.8	6	0
#65	1	31	0	1	1	0	0	0	0	1	1	0	0	0	0	0	0	0	1	1	1	1	12	19.1512	33.3839	0	25	33	29.3	37.3	0.84	5.17	1.58	3.21	15.3	1.23	321.55	81.73	49.14	112.96		5	0
#66	1	27	11	1	0	0	0	0	0	1	0	0	0	0	0	0	0	0	0	1	1	0	14	17.5556	33.4559	0	26	45	10.2	43	0.79	3.08	0.92	1.8	16.2	1.3	54.3	49.74	64.68	100.4	？	5	0
#67	1	37	0	1	0	0	0	0	0	1	0	0	0	0	0	0	0	0	0	0	1	0	9	18.6851	33.5025	0	21	26	10.9	38	1.58	5.89	1.25	3.92	13	1	50.53	75.8	69.54	95.92	-	5	0
#68	1	27	8	0	0	0	0	0	0	1	0	0	0	0	0	0	0	0	0	1	1	0	10	19.0039	33.5388	0	17	15	8.1	43.5	1.33	5.2	1.36	3.24	12.4	0.91	85.14	64.16	87.25	117.39	105.85	5	0
#69	1	22	1	1	1	0	0	0	0	1	0	0	0	0	0	0	0	0	0	0	0	0		19.7133	33.5548	0	31	48	22.8	48.8	0.57	3.71	1.43	2.02	14.9	1.15	54.35	63.85	51.5	118.09	445.45	5	0
#70	1	58	11	1	0	0	1	0	0	1	0	0	0	0	0	0	0	0	0	1	1	0	11	26.0617	33.689	0	15	23	6.8	37	2.41	5.57	1.01	3.46	12.8	0.98	30.28	45	55.22	143.79	-	5	0
#71	1	26	11	1	0	0	0	0	0	1	0	0	0	0	0	0	0	0	0	1	0	0	14	21.9774	33.7017	0	45	87	9.9	46	1.23	6	1.42	4.02	14.4	1.14	29.75	51.1	73.44	93.19	-	5	0
#72	0	23	8	1	0	0	0	0	0	1	0	0	0	0	0	0	0	0	0	0	0	0	9	18.6307	33.7292	0	18	15	6.2	37.1	0.79	4.77	1.27	3.14	12.7	0.97	28.11	42.08	42.68	124.33	496.18	5	0
#73	0	39	4	1	0	0	0	0	0	1	0	0	0	0	0	0	0	0	0	1	1	0	10	24.7676	33.7469	0	23.6	30.2	7.4	36.5	0.94	4.58	1.87	2.28	15.7	1.09						5	0
#74	1	17	2	1	1	0	0	0	0	1	0	0	0	0	0	0	0	0	0	1	1	1		20.8117	34.2105	0	19	18	6	43	3.35	4.98	1.07	2.39	12	0.9	25.05	65.53	232.56	92.05	-	5	0
#75	0	25	1	1	1	0	0	0	0	1	0	0	0	0	0	0	0	0	0	0	1	0		19.9792	34.375	0	20	20	8.1	39	0.37	3	1.36	1.47	14	1.07	21.84	65	68.02	99.42	869.62	5	0
#76	0	31	0	1	1	0	0	0	0	1	0	0	0	0	0	0	0	0	0	1	1	1	12	20.5693	34.375	0	17	15	12.5	38.3	1.08	4.15	1.25	2.41	14.4	1.13	18.92	51.64	75.63	98.65	595.59	5	0
#77	0	23	10	0	0	0	0	0	0	0	0	0	0	0	0	0	0	0	0	0	1	0		17.4818	34.4298	0	14	3	8.4	37	0.7	3.93	1.47	2.14	14.1	1.09	20.78	46.02	65.15	93.95	654.79	5	0
#78	1	26	3	1	1	0	0	0	0	1	0	0	0	0	0	0	0	0	0	1	1	1	10	25.9516	34.4828	0	22	26	20.8	44	1.59	3.86	0.87	2.27	13.9	1.07	104.16	37.43	58.02	108.98	-	5	0
#79	1	29	10	0	1	0	0	0	0	1	0	0	0	0	0	0	0	0	0	1	1	0	10	19.5682	34.8199	0	24	53	12.6	40	0.71	2.56	1.08	1.16	13.4	1.03	31.34	57.29	30.59	89.08	-	5	0
#80	1	18	12	1	0	0	0	0	0	0	0	0	0	0	0	0	0	0	0	0	0	0		20.2812	35.1175	0	93	36	19.3	54					16.4	0.97	4.08	38.03	80.3	95.02		5	0
#81	1	27	16	1	0	0	0	0	0	0	0	0	0	0	0	0	0	0	0	1	1	0		19.7055	35.1288	0	32	26	29	45.7	0.48	5.18	1.85	3.11	14.1	1.09	255.82	73.23	15.03	124.71		5	0
#82	1	18	2	1	0	0	0	0	0	1	0	0	0	0	0	0	0	0	0	1	1	0	9	17.9982	35.1351	0	8.2	19.8	7.7	50	0.56	3.7	1.36	2.09	16.3	1.17	30.47	46.25	115.11	104.91	0	5	0
#83	0	23	9	1	0	0	0	0	0	1	0	0	0	0	0	0	0	0	0	1	1	0	10	18.3594	35.1931	0	17	15	15.8	34.9	0.52	2.73	1.12	1.37	15.3	1.23	46.39	61.05	80.76	111.06	642.26	6	0
#84	1	40	20	0	1	0	0	1	0	1	0	0	0	0	0	0	0	0	0	0	1	0		19.257	35.248	0	19	12	23.7	36	1.74	3.66	1.45	1.42	14.2	1.1	285.56	64.46	81.02	120.7	-	5	0
#85	1	32	3	1	1	0	0	0	0	1	1	0	0	0	0	0	0	0	1	1	0	0		23.4375	35.4369	0	64	216	8.5	40.6	0.81	4.04	1.78	1.89	13.6	1.06	87.52	76.6	88.3	117.66	191.02	5	0
#86	1	41	4	1	1	0	0	0	0	1	0	0	0	0	0	0	0	0	0	1	1	0	10	21.2585	35.641	0	30	17	11.5	43					13.4	1.04					-	5	0
#87	0	37	5	1	1	0	0	0	0	1	0	0	0	0	0	0	0	0	0	1	1	1	14	19.3821	35.942	0	22	23	12.5	36.9	1.29	3.68	1.93	1.16	14.7	1.13	26.24	75.14	6.49	70.9	2142.99	5	0
#88	0	30	4	0	1	0	0	0	0	1	0	0	0	0	0	0	0	0	0	1	1	0	14		36	0	39	28	13.3	36	0.57	3.03	1.33	1.44	16.4	1.3	157	96.53	116.66	162.63	0	5	0
#89	1	10	7	1	0	0	0	0	0	0	0	0	0	0	0	0	0	0	0	1	0	0	7	15.3061	36.0104	0	69	74	16.1	45.8	0.94	5.79	1.92	3.44	12	0.89	9.87	68.05	53.26	102.87		5	0
#90	1	18	6	1	1	0	0	0	0	1	0	0	0	0	0	0	0	0	0	0	1	0	9	15.1496	36.0958	0	18.6	19.6	11.5	39	0.81	3.69	1.32	2	15.1	1.19	30.93	43.01	71.94	129.85	49.5	5	0
#91	1	8	1	1	0	0	0	0	0	0	0	0	0	0	0	0	0	0	0	0	0	0	7	14.08	36.1374	0	56	116	4.3	40.3	2.56	5.95	0.95	3.84	11.7	0.88	34.69	47.8	64.1	111.01	193.09	5	0
#92	1	4	0	0	0	0	0	0	0	0	0	0	0	0	0	0	0	0	0	0	0	0	7	15.0815	36.3938	0	90	78	7.1	44					11.8	0.87	65.62	56.83	163.02	129.49	-	5	0
#93	0	28	6	0	0	0	0	0	0	1	0	0	0	0	0	0	0	0	0	1	0	0	10	19.5312	36.6446	0	17	30	6.7	39.3	1.68	4.04	0.75	2.53	13.3	1.03	38.35	57.46	62.19	91.92	994.06	5	0
#94	1	20	12	1	0	0	0	0	0	0	0	0	0	0	0	0	0	0	0	0	0	0	10	18.7755	36.7816	0	91	38	20.1	48.5	1.04	4.66	1.61	2.58	14.3	1.09	9.74	53.86	6.3	78.73		5	0
#95	1	35	7	1	1	0	0	0	0	1	0	0	0	0	0	0	0	0	0	1	0	0	12	20.7476	36.8121	0	36	63	14.6	49.2	0.92	3.85	1.17	2.26	14.9	1.18					455.04	5	0
#96	0	20	7	1	1	0	0	0	0	0	0	0	0	0	0	0	0	0	0	0	1	0	8		36.862	0	25	18	33.4	44	0.69	3.26	1.4	1.55			32.33	44	129.02	91.87
#97	0	36	7	1	0	0	0	0	0	1	0	0	0	0	0	0	0	0	0	0	0	0		18.3594	36.9091	0	5	15	15.7	43	0.38	3.43	1.07	2.19	17.8	1.05	26.75	39.05	68.69	95.33		6	0
#98	0	24	3	1	0	0	0	0	0	0	0	0	0	0	0	0	0	0	0	0	0	0	9	22.7615	36.9347	0	93	64	13.8	34					15.2	1.19	34.77	60.41	79.37	117.25		6	0
#99	1	13	0	0	0	0	0	0	0	1	0	0	0	0	0	0	0	0	0	1	1	1	9	17.4747	36.983	0	30	32	6.93	40					13.6	1.06	74.9	56.33	201.29	128.16	-	5	0
#100	0	32	9	1	0	0	0	0	0	0	0	0	0	0	0	0	0	0	0	1	0	0		22.4323	37.1493	0	12	17	6.8	46							44.63	47.42	55.92	95.06
#101	0	17	0	1	0	0	0	0	0	0	0	0	0	0	0	0	0	0	0	1	0	0	10	24.6097	37.1879	0	43	64	6.9	39.7	1.32	6.03	1	4.43	12.6	0.97	34.84	68.04	86.86	139.2	820.98	5	0
#102	0	14	1	1	0	0	0	0	0	0	0	0	0	0	0	0	0	0	0	1	1	0	7	19.8373	37.3057	0	22	19	5.5	43					13.1	0.99	39.84	55.66	178.07	120.63	-	5	0
#103	1	30	11	1	0	0	0	0	0	0	0	0	0	0	0	0	0	0	0	0	1	0		18.8492	37.3673	0	26	30	10.1	45.5					13.8	1.05					216.62	5	0
#104	1	27	11	0	0	0	0	0	0	0	0	0	0	0	0	0	0	0	0	0	1	1	10	24.0741	37.5	0	64	27	19.4	44.8	1.07	5.26	1.23	3.54	13.2	0.98	25.7	63.33	42.03	101.77		5	0
#105	1	29	10	1	0	0	0	0	0	1	0	0	0	0	0	0	0	0	0	0	1	0	11	24.4352	37.8378	0	16	5	13	42	0.59	2.94	1.11	1.56	13.9	1.08	97.1	54.87	92.21	123.14	168.67	5	0
#106	0	18	2	1	1	0	0	0	0	1	0	0	0	0	0	0	0	0	0	0	1	1	9	20.5688	37.9066	0	24	23	11.2	48	0.64	3.69	1.24	2.16	12.8	0.96					-	5	0
#107	0	25	10	1	0	0	0	0	0	1	0	0	0	0	0	0	0	0	0	1	0	0		19.6283	38.2189	0	29	48	5.7	33	1.84	3.92	1.24	1.84	13	0.99	32.67	44.26	43.73	110.13	886.21	6	0
#108	1	14	8	1	0	0	0	0	0	0	0	0	0	0	0	0	0	0	0	0	0	0	7	25.0995	38.2514	0	47	91	12.4	43	3.36	5.2	1.11	2.56	11.5	0.84	24.54	61.85	199	133.6	-	5	0
#109	0	19	5	1	0	0	0	0	0	0	0	0	0	0	0	0	0	0	0	1	0	0	8	20.9572	38.6684	0	16	6	8.7	44	1.65	3.45	0.82	1.88	13.5	1.03	18.7	34.96	64.75	112.28	729.63	5	0
#110	0	34	20	1	0	0	0	0	0	1	0	0	0	0	0	0	0	0	0	0	1	0		12.9032	38.8601	0	10	28	13.8	34	0.62	4.28	1.56	2.44	16.3	1.31	94.52	59.67	94.48	129.04	966.81	6	0
#111	1	11	10	1	0	0	0	0	0	0	0	0	0	0	0	0	0	0	0	1	0	0	9	18.0737	38.8728	0	77	89	7.8	46	2.48	3.9	1.42	1.35	11.9	0.87	26.38	62.5	149.11	144.35	378.02	5	0
#112	0	28	9	1	0	0	0	0	0	1	0	0	0	0	0	0	0	0	0	1	1	0	10	17.5781	38.8889	0	28	26	27.5	44	0.98	4.03	1.29	2.29	15.1	1.2	23.12	45.46	44.54	100.1	0	5	0
#113	0	32	5	0	1	0	0	0	0	1	0	0	0	0	0	0	0	0	0	1	1	0	13	21.0772	39.1582	0	13	7	9.2	36.1	1.23	2.9	0.86	1.48	14.3	1.14					？	5	0
#114	1	23	10	1	0	0	0	0	0	1	0	0	0	0	0	0	0	0	0	1	0	0	13	21.4619	39.4495	0	75	68	17.8	37	0.9	5.23	1.9	2.92	12.4	0.94	58.15	61.94	97.73	126	-	5	0
#115	0	39	20	1	0	0	0	0	0	1	1	0	0	0	0	0	1	0	0	0	0	0	11	23.1111	39.6088	0	46	29	30.8	33	0.79	3.88	1.92	1.6	14.5	1.13	436.43	89.24	126.75	131.96	-	7	1
#116	0	21	19	1	0	0	0	0	0	0	0	0	0	0	0	0	0	0	0	0	0	0	8	18.3594	39.6907	0	22	8	8.2	35.9	0.84	3.82	1.5	1.94	13	1.01	34.92	52.34	77.73	122.18	703.56	5	0
#117	0	26	18	1	1	0	0	0	0	0	0	0	0	0	0	0	0	0	0	0	1	0	8	22.0317	39.7028	0	35	12	8.4	45	0.52	3.66	1.25	2.17	13.8	1.06	25.4	42.52	104.29	93.65	-	5	0
#118	1	18	4	1	1	0	0	0	0	1	0	0	0	0	0	0	0	0	0	0	1	0		18.1661	40.1146	0	25	7	18.5	44	2.15	4.08	1.09	2.01	13.9	1.08	30.11	46.21	85.75	115.7	215.45	5	0
#119	0	20	6	1	0	0	0	0	0	1	0	0	0	0	0	0	0	0	0	1	1	0		20.7031	40.2299	0	27	36	6.3	40	1.21	3.94	1.06	2.33	13.3	1.02	25.62	42.84	50.86	111.71	35.89	5	0
#120	1	16	0	1	1	0	0	0	0	1	0	0	0	0	0	0	0	0	0	1	1	0	12	16.225	40.2941	0	27	21	12.6	39.3	0.56	2.68	0.83	1.6	16.1	1.3	47.35	38.36		90.98	675.03	5	0
#121	0	30	9	1	0	0	0	0	0	1	0	0	0	0	0	0	0	0	0	0	1	0	10	19.1406	40.3883	0	20	23	13.9	33	1.08	4.12	1.36	2.27	14.2	1.1	27.55	44.43	57.73	124.93	61.68	6	0
#122	1	25	5	1	0	0	0	0	0	0	0	0	0	0	0	0	0	0	0	0	1	0	10	19.6927	40.4	0	21	28	15.1	46	0.62	4.88	1.47	3.13	13.2	1.03	38.47	49	74.2	108.13	2492.75	5	0
#123	0	41	24	1	0	0	0	0	0	0	0	0	0	0	0	0	0	0	0	0	1	0	10	14.8605	40.4167	0	20	6	13.3	40	1.83	4.17	1.09	2.25	13.2	1.01	41.35	47.66	42.74	124.18	384.46	5	0
#124	1	19	2	1	0	0	0	0	0	0	0	0	0	0	0	0	0	0	0	0	1	0		19.052	40.5405	0	19.5	29.6	7	45.1	1.04	4.17	1.05	2.65	13.9	1.07	19.62	38.07	89.73	129.85	137.95	5	0
#125	0	47	10	1	0	0	0	0	0	0	0	0	0	0	0	0	0	0	0	0	0	0	12	23.1473	40.9586	0	40	36	6.8	41.4	2.27	4.48	0.85	2.6	12.3	0.92	72.18	56.33	39.4	110.93		5	0
#126	1	33	13	1	0	0	0	0	0	1	0	0	0	0	0	0	0	0	0	1	1	0	10	15.5709	41.048	0	26	28	10	43	0.44	3.49	1.09	2.2	15.4	1.23	36.95	48.62	64.6	114.76	13.1	5	0
#127	0	24	4	1	1	0	0	0	0	1	0	0	0	0	0	0	0	0	0	1	1	0	9	20.5761	41.0579	0	15	9	7.7	39	0.39	3.01	1.01	1.82	14.4	1.1	54.71	37.83	77.71	103.53	-	5	0
#128	1	23	5	0	0	0	0	1	0	1	0	0	0	0	0	0	0	0	0	1	1	0	10	20.7612	41.0989	0	18	14	14.5	41	0.88	4.24	0.99	2.85	14	1.08	45.72	42.06	88.7	106.7	631.49	5	0
#129	1	22	0	0	1	0	0	0	0	0	0	0	0	0	0	0	0	0	0	0	1	1		24.7555	41.519	0	13	19	15.4	38.5	0.87	4.16	0.92	2.84	13.8	1.07	14.37	47.26	40.46	90.86		5	0
#130	1	4	0	0	0	0	0	0	0	0	0	0	0	0	0	0	0	0	0	0	0	0	5	14.4175	41.5789	0	87	97	9	44	1.31	4.64	1.3	2.74	13.3	1.03	33.57	59.45	95.67	129.05	-	5	0
#131	1	33		1	0	0	0	0	0	1	1	0	0	1	0	0	0	0	1	1	0	0		20.8828	41.8936	0	36	33	9.9	34.8					15.9	1.26					？	6	0
#132	1	23	0	0	0	0	0	0	0	1	0	0	0	0	0	0	0	0	0	1	1	0	15	18.5185	41.9552	0	32	45	13.9	36	0.69	3.04	0.93	1.8	13.9	1.08	109.4	56.64	130.92	122.45	-	5	0
#133	0	20	12	1	0	0	0	0	0	0	0	0	0	0	0	0	0	0	0	0	0	0	9	21.4844	42	0	28	12	6.6	39.9	0.51	4.58	1.56	2.79	13.5	1.05	21.65	45.61	43.96	94.6	716.86	5	0
#134	0	15	1	1	0	0	0	0	0	0	0	0	0	0	0	0	0	0	0	0	1	0		16.7311	42.1196	0	6	21	6.2	38	2.83	4.11	1.33	1.49							0
#135	0	28	20	1	0	0	0	0	0	1	0	0	0	0	0	0	0	0	0	1	1	0	9	19.9792	42.2993	0	31	36	16.5	44	0.83	4.21	1.55	2.28	13.1	0.99	53.41	40.23	71.36	106.44	-	5	0
#136	1	23	5	1	1	0	0	0	0	0	0	0	0	0	0	0	0	0	0	0	0	0		15.917	42.348	0	15	4	10.7	41
#137	1	45	6	0	0	0	0	0	0	1	0	0	0	0	0	0	0	0	0	0	1	0	10	24.858	42.3636	0	57	83	13.4	38	1.22	3.1	1.21	1.34	14	1.08	327.52	82.34	115.33	132.36	2644.04	5	0
#138	1	32	9	1	0	0	0	0	0	1	0	0	0	0	0	0	0	0	0	0	1	0	9	18.0427	42.4757	0	32.6	19.2	8.6	36.8	1.13	4.4	1.37	2.52	14.2	1.1	39.18	35.56	63.36	89.69	0	5	0
#139	1	25	4	1	0	0	0	0	0	1	0	0	0	0	0	0	0	0	0	1	1	0	11	18.424	42.803	0					1.02	3.7	1.12	2.12	14.9	1.16	104.94	62.18	53.5	106.21	259.76
#140	0	48	10	0	0	0	0	0	0	1	0	0	0	0	0	0	0	0	0	0	0	0	12	27.5556	42.8571	0	89	55	15.7	44.1	1.75	5.09	1.02	3.27	11.8	0.89	33.28	43.13	19.83	86.63		5	0
#141	1	4	1	1	0	0	0	0	0	0	0	0	0	0	0	0	0	0	0	0	0	0		14.5748	43.3114	0	111	102	4.4	40	1.32	3.82	1.52	1.7	16.8	0.92	13.77	55.05	91.01	119.45		5	0
#142	1	50	20	1	0	0	0	1	0	1	0	0	0	0	0	0	0	0	0	1	1	0		23.8751	43.4109	0	66	90	89.6	26	0.43	6.56	1.63	4.73	17.2	1.39	355.63	103.87	62.5	151.59	456.14	10	1
#143	1	20	1	1	1	0	0	0	0	0	0	0	0	0	0	0	0	0	0	0	1	0			43.469	0	21	9	6.8	39	0.59	3.79	1.05	2.47	13.5	1.03	18.62	46.85	104.34	102.71	710.6	5	0
#144	1	22	1	1	1	0	0	1	0	1	0	0	0	0	0	0	0	0	0	1	1	0	11	27.3438	43.5928	0	27	44	14.2	33	0.69	4.11	2.06	1.74	13.8	1.07	63.52	79.16	80.55	169.45	-	6	0
#145	1	26	4	1	1	0	0	1	1	1	0	0	0	0	0	0	0	0	0	1	1	0	11	21.2245	43.8017	0	23	15	13.7	38	0.89	3.5	1.21	1.89	13.5	1.03	45.54	53.85	79.93	132.46	-	5	0
#146	1	21	1	0	1	0	0	0	0	1	0	0	0	0	0	0	0	0	0	1	1	0	12	20.0617	44.2509	0	17	9	5.4	44	1.01	4.39	1.23	2.7	14.9	1.15	54.22	60.11	109.06	129.26	2910.7	5	0
#147	1	19	4	1	1	0	0	0	0	0	0	0	0	0	0	0	0	0	0	0	1	1	11	21.4844	44.4874	0	33	23	7.9	51					13.2	1.02	66.5	61.2	145.44	98.94	-	5	0
#148	1	30	14	1	0	0	0	0	0	1	0	0	0	0	0	0	0	0	0	1	1	0	10	25.2595	44.5151	0	28	32	17.9	39.8	2.84	5.32	1.29	2.74	13.1	1	129.97	77.19	92.81	125.1	1844.78	5	0
#149	0	2	0	0	0	0	0	0	0	0	0	0	0	0	0	0	0	0	0	0	0	0		8.31025	44.5783	0	89	149	4.2	43	0.91	4.95	1.55	2.99	12	0.9	40.32	70.01	143.86	148.85	565.94	5	0
#150	0	38	2	1	0	0	0	0	0	1	0	0	0	0	0	0	0	0	0	0	0	0		19.433	44.697	0	16	7	9.1	44							27.53	47.16	24.31	81.79
#151	1	21	7	1	0	0	0	0	0	0	0	0	0	0	0	0	0	0	0	0	0	0	9	22.2753	45.4693	0	10	16	12.9	44	0.76	4.08	1.22	2.51			25.73	41.94	93.92	97.32
#152	0	24	4	1	0	0	0	0	0	1	0	0	0	0	0	0	0	0	0	0	1	0		16.3847	45.8537	0	19.3	23	14	42.1	0.42	3.08	1.17	1.72	15	1.17	25.52	49.99	50.85	111.18		5	0
#153	0	34	4	1	0	0	0	0	0	1	0	0	0	0	0	0	0	0	0	1	0	0		24.0238	45.8554	0	18	27	11.2	43	1.23	3.86	0.99	2.31	14.5	1.13	78.48	42.5	85.63	131.29	213.2	5	0
#154	1	28	7	1	1	0	0	0	0	1	0	0	0	0	0	0	0	0	0	1	1	0	9	20.5289	45.8874	0	18	22	14.1	49	0.87	3.61	1.5	1.71	12.8	0.98	15.89	41.08	52.29	91.94	-	5	0
#155	0	24	6	1	1	0	0	0	0	1	0	0	0	0	0	0	0	0	0	1	1	0		18.5901	46.2871	0	12	17	7.3	40	1.41	3.68	1.46	1.58	13.9	1.06	29.41	51.55	46.23	95.49		5	0
#156	0	21	3	1	0	0	0	0	0	0	0	0	0	0	0	0	0	0	0	0	1	0	8	15.2219	46.4497	0	7	17	5.2	35					14.5	1.12	20.69	44.44	73.98	107.89		6	0
#157	0	18	3	1	0	0	0	0	0	1	0	0	0	0	0	0	0	0	0	1	0	0		16.901	46.4706	0	18	17	9.1	44	1.03	4.19	1.16	2.56	13.8	1.07	20.65	49.16	42.13	116.03	465.24	5	0
#158	0	28	8	1	0	0	0	0	0	1	0	0	0	0	0	0	0	0	0	0	1	0	7	17.898	46.6321	0	40	47	16.6	34.8	0.74	3.77	1.26	2.17	14.1	1.08	26.82	58.14	84.08	73.91	1153.68	6	0
#159	0	11	1	1	0	0	0	0	0	0	0	0	0	0	0	0	0	0	0	0	0	0	6	13.7174	46.7375	0	28	37	4	40.5	2.62	4.42	0.95	2.28	12.3	0.94	20.77	46.19	64.69	95.21	266.56	5	0
#160	0	36	4	1	0	0	0	0	0	1	0	0	0	0	0	0	0	0	0	1	0	0	7	20.4444	47.0389	0	84	45	9.1	43					14	1.09					454.01	5	0
#161	1	16	6月	1	0	0	0	0	0	0	0	0	0	0	0	0	0	0	0	0	1	0	8	15.9675	47.081	0											28.41	53.82	114.05	99.41
#162	0	23	7	1	0	0	0	0	0	0	0	0	0	0	0	0	0	0	0	0	0	0	10	26.0584	47.093	0	20	27	9.8	42.9	0.98	4.58	1.46	2.67	13.2	0.98	19.99	46.51	45.54	108.64	563.38	5	0
#163	1	14	4	1	0	0	0	0	0	1	0	0	0	0	0	0	0	0	0	0	0	0	8	16.396	47.0948	0	38	70	10.1	43	2.43	4.81	1.08	2.63	12.5	0.93	35.07	64.1	269.21	124.1	-	5	0
#164	0	25	12	1	0	0	0	0	0	0	0	0	0	0	0	0	0	0	0	1	1	0	10	22.8374	47.9592	0	20	17	11.6	43.5	1.01	3.78	1	2.32	13.2	1.03	45.5	46.86	16.16	117.35	2080.63	5	0
#165	1	27	5	1	0	0	0	1	0	1	0	0	0	0	0	0	0	0	0	1	1	0		20.3451	48.1405	0	75	55	17.1	38	1.2	3.46	1.33	1.58	17	1.12						6	0
#166	1	18	1	0	1	0	0	0	0	0	0	0	0	0	0	0	0	0	0	0	1	0		16.1778	48.3871	0	18	9	10.3	41	0.98	4.1	1.07	2.58	14.2	1.13	57.01	40.75	43.04	96.56	599.78	5	0
#167	0	6	3	1	0	0	0	0	0	0	0	0	0	0	0	0	0	0	0	0	0	0	6	15.9722	48.4646	0	121	82	6.2	37	1.23	4.11	1.12	2.43			31.08	60.03	132.33	123.28	178.94
#168	1	10	1	1	0	0	0	0	0	0	0	0	0	0	0	0	0	0	0	0	0	0	8	14.6706	48.6301	0	75	61	7.8	44					13.1	1.01	41.04	65.96	138.22	131.98	-	5	0
#169	1	12	9	0	0	0	0	0	0	0	0	0	0	0	0	0	0	0	0	0	0	0		13.8444	48.7461	0	76	75	8.6	43	2.86	5.31	1.49	2.52	12.6	0.94	34.22	58.3	195.12	109.83	445.2	5	0
#170	1	27	8	0	0	0	0	0	0	1	0	0	0	0	0	0	0	0	0	1	1	0	9		48.9431	0	45.7	32.9	5.4	38.9	0.68	3.82	1.22	2.29	13.6	1.05	46.32	55.1	88.67	118.79		5	0
#171	0	56	15	1	0	0	0	0	0	1	0	0	0	0	0	0	0	0	0	1	1	1	10	22.0741	48.9451	0	18	18	14	39	1.7	5.82	1.24	3.81	12.3	0.89	29.3	70.78	65.19	133.75	201.99	5	0
#172	1	41	0	0	0	0	0	1	0	0	0	0	0	0	0	0	0	0	0	0	0	0	13	24.7934	49.1329	0	47	72	9.4	50	2.13	7.63	1.28	5.38	11.8	0.88					104.18	5	0
#173	1	33	10	1	1	0	0	0	0	0	0	0	0	0	0	0	0	0	0	0	1	0		20.0155	50.358	0	9	7	28.2	43	1.14	4.66	1.29	2.85	13.5	1.03	21.67	42.8	70.61	126.56	225.18	5	0
#174	0	34	7	1	0	0	0	0	0	1	0	0	0	0	0	0	0	0	0	1	1	0	10	18.3249	51.5213	0	20	15	13.6	40					13.5	1.05	105.72	55.54	66.74	93.18	-	5	0
#175	1	8	2	1	0	0	0	0	0	1	0	0	0	0	0	0	0	0	0	0	0	0	6	14.2766	51.6887	0	87	45	12.7	43	2.1	4.97	1.07	2.95	12.6	0.96	24.54	55.75	99.8	126.01	-	5	0
#176	1	22	16	1	0	0	0	0	0	0	0	0	0	0	0	0	0	0	0	0	0	0	8	19.433	52.2613	0	20	28	11.7	37	1.98	4.76	1.3	2.56	13.6	1.06	16.21	49.54	83.5	111.24	-	5	0
#177	1	5	0	1	0	0	0	0	0	0	0	0	0	0	0	0	0	0	0	0	0	0	6	16.7955	52.6992	0	49	55	5.2	39	2.13	6.46	1.25	4.24	11.8	0.89	21.36	56.34	119.93	109.56	-	5	0
#178	1	19	17	1	0	0	0	0	0	0	0	0	0	0	0	0	0	0	0	0	0	0	11	20.3383	53.1685	0	50	24	8.5	40	0.74	3.6	1.18	2.08	12.9	0.96	68.14	57.72	6.22	106.07	1038.75	5	0
#179	0	21	11	1	0	0	0	0	0	0	0	0	0	0	0	0	0	0	0	0	0	0	9	18.9866	53.8947	0	20	34	17	40	1.1	3.75	1.05	2.2	14.4	1.13	28.23	46.58	77.03	119.16	-	5	0
#180	1	7	1	1	0	0	0	0	0	0	0	0	0	0	0	0	0	0	0	0	0	0	6	16.6352	54.1106	0	70	62	6.6	40					11.6	0.87	25.09	58.8	107.61	125.62	-	5	0
#181	1	24	14	1	1	0	0	0	0	1	0	0	0	0	0	0	0	0	0	1	1	1		20.8117	54.3317	0	49	51	8.8	40	1.49	4.29	1.52	2.09	13.8	1.06	177.71	68.96	97.1	155.62	65.38	5	0
#182	1	3	0	0	0	0	0	0	0	0	0	0	0	0	0	0	0	0	0	0	0	0		32.4394	54.4348	0	90	269	4.6	41.7					12.2	0.91	91.51	83.1	27.73	133.69	286.41	5	0
#183	0	26	15	1	0	0	0	0	0	1	0	0	0	0	0	0	0	0	0	0	1	0		19.8347	54.6099	0	13	10	10.3	35	0.84	3.18	1.06	1.74	13.7	1.06	25.58	46.78	74.97	94.47	240.15	6	0
#184	0	26	0	0	0	0	0	0	0	0	0	0	0	0	0	0	0	0	0	1	1	0		16.4062	54.8057	0	18	14	7.2	36	0.86	2.81	1.09	1.33	15.1	1.19	57.15	67.49	155.85	99.42	1514.04	5	0
#185	0	50	13	0	1	0	0	0	0	1	0	0	0	0	0	0	0	0	0	0	1	0		21.4844	55.1948	0	37	7	7	35	0.71	2.77	1.12	1.33	13.1	0.99	145.71	65.34	67.78	130.79	-	6	0
#186	0	21	8	1	1	0	0	0	0	1	0	0	0	0	0	0	0	0	0	1	0	0		23.634	55.5901	0	28	29	8.2	35	1.3	4.51	1.31	2.61	14.2	1.09	39.28	66.91	63.75	126.21	930.84	6	0
#187	1	9	6	1	0	0	0	0	0	0	0	0	0	0	0	0	0	0	0	0	0	0	7.7	15.1384	55.7093	0	30	27	6.1	42	3.46	5.38	0.91	2.9	12.3	0.91	22.55	53.06	74.13	111.68	-	5	0
#188	1	26	12	1	0	0	0	0	0	1	0	0	0	0	0	0	0	0	0	1	1	0	12	27.8994	55.7214	0	16	27	19.4	38.7	1.34	5.49	1.38	3.5	13.6	1.07						5	0
#189	0	36	15	1	1	0	0	0	0	0	0	0	0	0	0	0	0	0	0	0	1	0	10	23.5078	55.9211	0	16	11	8.9	39.6	0.77	4.44	1.62	2.47	12.8	0.94	73.55	50.17	53.18	98.13	199.19	5	0
#190	0	12	4	1	0	0	0	0	0	1	0	0	0	0	0	0	0	0	0	1	0	0	8	17.9688	56.129	0	79	97	15.1	40	0.89	3.5	1.45	1.65	12.9	0.97	39.23	64.5	146.07	134.48	-	5	0
#191	1	25	5	1	1	0	0	0	0	0	0	0	0	0	0	0	0	0	0	1	1	1	11	18.7328	57.3737	0	47	84	10.4	37	0.64	2.86	1.4	1.17	14.4	1.11	70.64	68.02		118.53	75.96	5	0
#192	0	27	13	1	0	0	0	0	0	0	0	0	0	0	0	0	0	0	0	0	1	0			57.6446	0	23	27	9.9	37	0.62	4.39	2.4	1.71	13.1	1	39.53	53.88	102.63	98.92	58.8	5	0
#193	1	17	5	1	0	0	0	0	0	0	0	0	0	0	0	0	0	0	0	0	0	0	9	19.9184	57.8199	0	10	8	13.1	41	1.14	3.93	1.21	2.2	14.1	1.1	21.38	49.45	143.51	105.5	-	5	0
#194	1	19	11	1	0	0	0	0	0	0	0	0	0	0	0	0	0	0	0	0	0	0	11	21.8573	58.2057	0	58	85	13.1	44	1.51	5.94	1.55	3.7			25	46.14	60.3	117.33
#195	0	23	0	0	0	0	0	0	0	0	0	0	0	0	0	0	0	0	0	1	1	1	9	27.2932	58.3587	0	39	57	8.6	38.6	1.15	3.63	1.45	1.66	13.3	1.03					89.67	5	0
#196	0	22	6	1	1	0	0	0	0	1	0	0	0	0	0	0	0	0	0	1	1	0	9	22.0317	60.0768	0	14	26	5.2	41	1.06	3.64	1.64	1.52	14.1	1.08	104.61	49.47	53.32	119.97		5	0
#197	1	23	6	1	0	0	0	0	0	1	0	0	0	0	0	0	0	0	0	0	0	0		17.5056	61.5385	0	78	69	9.1	43	1.42	3.11	0.97	1.49	13.6	1.04	44.6	45.77	65.15	102.75	-	5	0
#198	1	6	0	1	0	0	0	0	0	0	0	0	0	0	0	0	0	0	0	0	0	0		14.3433	61.8227	0	46	15	3.7	36.7	0.8	3.6	1.31	1.93	12.4	0.94	53.08	55.56	148.54	120.73	383.5	5	0
#199	0	15	10	1	0	0	0	0	0	0	0	0	0	0	0	0	0	0	0	1	0	0	7	18.424	61.8421	0	29	24	10.5	41.8	3.52	5.45	1.56	2.29	12.9	1	22.51	40.85	47.63	131.02	607.77	5	0
#200	0	5	1	1	0	0	0	0	0	0	0	0	0	0	0	0	0	0	0	0	0	0		15.3894	63.6971	0	134	69	4.1	37	1.33	9.7	1.64	7.46	13.7	1.05	20.11	56.34	113.87	129.36		5	0
#201	0	20	3	1	1	0	0	0	0	1	0	0	0	0	0	0	0	0	0	1	1	0	9	19.9481	64.751	0	49	29.5	20.1	38.1	0.6	3.41	1.3	1.84	15.3	1.21	148.35	55.27	88.31	101.17		5	0
#202	0	21	8	1	0	0	0	0	0	1	0	0	0	0	0	0	0	0	0	1	1	1		19.5312	64.7541	0	10	18	10.8	44	0.95	4.76	2.16	2.17
#203	1	19	9	0	0	0	0	0	0	0	0	0	0	0	0	0	0	0	0	0	1	1	11	21.0498	65.6085	0	19	28	17.4	40.3	0.58	3.48	0.94	2.28	14.6	1.13	65.31	64.33	47.6	132.86		5	0
#204	0	8	5	1	0	0	0	0	0	0	0	0	0	0	0	0	0	0	0	0	0	0	6	14.9182	66.8852	0	43.3	37.3	10.1	39.9					17.2	1.13	26.63	51.42	121.87	100.36		6	0
#205	0	42	14	1	0	0	0	0	0	0	0	0	0	0	0	0	0	0	0	0	0	0	10	23.9188	67.2811	0	18	24	9.3	41.9	1.88	6.24	1.26	4.13	12.4	0.93	50.33	54.81	40.74	116.55		5	0
#206	1	34		1	0	0	0	0	0	1	0	0	0	0	0	0	0	0	0	1	0	0		22.0386	68.4536	0	26.4	23.7	8.3	38	0.97	3.63	1.46	1.73	13.8	1.05						5	0
#207	0	29	6	1	0	0	0	0	0	1	0	0	0	0	0	0	0	0	0	1	1	0	10	17.0392	80.8943	0	7	15	3.3	37	0.77	2.34	0.88	1.11	14.9	1.17						5	0
#208	0	16	12	1	0	0	0	0	0	0	0	0	0	0	0	0	0	0	0	1	0	0	10	20.3244	82.4096	0	30	43	17.6	34.6	1.84	5.3	1.13	3.33	13.1	0.98	53.5	62.83	100.49	121.41	1249.79	6	0
#209	0	29	9	0	0	0	0	0	0	0	0	0	0	0	0	0	0	0	0	0	1	0	8	18.0662	96.748	0	14	12	7.8	40					14.6	1.14	22.95	33.67	74.25	84.53	-	5	0
#210	0	29	8	1	0	0	0	0	0	1	0	0	0	0	0	0	0	0	0	1	1	0	8	21.875	100	0	23.4	29.3	18.6	39.1	0.57	3.66	1.62	1.78	14.4	1.11						5	0
#211	1	8	0	1	0	0	0	0	0	0	1	0	1	0	0	0	1	1	0	1	0	0	8		2.84257	1	256	173	299.3	35	0.36	2.69	0.78	1.63	64.7	7.62					-	12	1
#212	1	47	10	1	0	0	0	0	0	1	1	0	2	0	0	0	0	0	1	0	0	0			5.06198	1	38	27	53.2	26.3					45.5	4.8					？	13	1
#213	0	21	0	1	1	0	0	0	0	1	1	0	0	0	0	0	0	0	1	1	0	0	10	21.4533	5.18257	1	85	66	80.6	30	0.52	3.19	0.66	2.29	22.6	1.98	1170.01	143.2	189.53	108.16	2676.49	10	1
#214	1	31	8	1	0	0	0	1	0	1	1	0	0	0	0	0	1	1	1	1	0	0		28.7317	6.1245	1	90	68	94.9	38.9					32.8	3.21	1026.32	136	281.2	60.34	1529.3	10	1
#215	0	38	10	1	0	0	0	0	0	1	1	0	1	0	0	0	0	0	0	1	1	0	10		6.75381	1	75	85	98.8	38					27.7	2.54	1177.94	269.31	352.47	204.11	459.5	10	1
#216	0	26	1	1	0	0	0	0	0	1	0	0	0	0	0	0	0	0	0	0	1	0		16.5289	6.98174	1	26	20	9.7	34	0.77	3.98	1.34	2.29	16.1	1.29	89.91	68.34	84.72	110.42	752.89	6	0
#217	0	17	4	0	1	0	0	0	0	1	0	0	0	0	1	0	0	0	0	1	1	0	14	25.3902	8.3878	1	21	145	190	25.6					36.1	3.56	953.17	129.1	34	142.78		11	1
#218	0	24	2	0	0	0	0	0	0	0	0	0	0	0	0	0	0	0	0	0	0	0	11	24.0346	8.89878	1	26	30	8.1	37.7	1.03	4.27	1.68	2.12	14.9	1.2	156.39	66.97	11.58	86.77	1931.98	5	0
#219	0	28	0	1	0	0	0	0	0	1	1	0	0	0	0	0	0	0	1	1	1	0	10	18.2899	9.02174	1	55	39	18.5	33.3	0.29	2.82	1.43	1.26	21.3	1.86	577.3	88.41	235.52	114.21	1353.46	8	1
#220	0	16	2	1	0	0	0	0	0	0	0	0	0	0	0	0	0	0	0	0	1	0	8	12.6413	9.57179	1	20	15	8.6	44	0.79	2.63	1.09	1.18	14.4	1.15	70.6	44.64	61.16	94.31	207.83	5	0
#221	0	62	0	0	0	0	0	0	0	1	1	0	1	0	0	0	0	0	0	0	0	0	13	21.2279	9.62567	1	158	234	153.1	35.2	1.59	4.82	0.36	3.74	29.8	2.92	850.25	125.01	118.06	121.32	782.3	10	1
#222	0	31	3	0	1	0	0	0	0	1	1	0	1	0	0	0	1	1	1	1	1	0	10		10.0849	1	99	92	99.4	35					32.2	3.07	1137.74	113.36	117.6	127.44	751.36	12	1
#223	1	17	6	1	1	0	0	0	0	1	1	0	0	0	0	0	0	0	1	1	0	0	14	16.4233	10.3409	1	99	52	69.8	43.7					32.6	3.12	623.85	77.86		93.07	2779.01	9	1
#224	0	35	23	0	0	0	0	0	0	1	1	0	1	0	0	1	0	0	0	1	1	0	11	28.9694	10.5469	1	16	35	19.3	27	0.57	2.23	1.09	0.9	14.4	1.11						8	1
#225	0	35	9	1	0	0	0	0	0	1	1	0	1	0	0	0	1	1	0	1	1	0			10.5656	1	202	84	51.9	30	0.85	3.59	0.8	2.4	22.7	1.98					258.04	12	1
#226	1	22	8	1	1	0	0	0	0	1	0	0	0	0	0	0	0	0	0	0	1	1	9	18.9292	11.5054	1	23	32	7	32	0.91	5.53	2.23	2.85	16.3	1.3	72.71	65.96	111.83	113.95	478.96	6	0
#227	0	19	3	0	1	0	0	0	0	1	0	0	0	0	0	0	0	0	0	1	1	0	14	20.6193	11.5741	1	33	27	21.9	35	0.85	2.12	1.12	0.61	17.3	1.42	53.58	97.08	76.7	71.32	-	7	1
#228	1	22	7	1	0	0	0	0	0	1	0	0	0	0	0	0	0	0	0	1	1	0	10	17.5556	12	1	51	63	37.3	36	0.82	4	1.58	2.05	16.7	1.39	142.35	71.32	180.92	126.78	-	6	0
#229	1	30	4	0	1	0	0	0	0	1	0	0	0	0	0	0	0	0	0	0	1	0	10	19.2672	12.8012	1	20	12	44.7	35.7	1.05	4.1	1.39	2.23	14.4	1.14					197.3	6	0
#230	1	29	1	1	1	0	0	0	1	1	1	0	1	0	0	0	0	0	0	1	1	0	12	23.1834	13.089	1	27	35	21.1	37.3	0.72	3.32	1.06	1.93	17.7	1.47	92.73	51.52	85.88	101.95	261.8	7	1
#231	1	33	3	1	0	0	0	0	0	1	1	0	0	0	0	0	0	0	1	1	0	0		26.5731	13.1016	1	24	13	32.1	29					21.4	1.86	571.54	97.82	190.69	92.48	-	8	1
#232	0	14	6	1	0	0	0	0	0	1	1	0	0	0	0	0	0	0	1	1	1	0	8	19.8681	13.3803	1	49	35.3	27.4	36	0.36	2.82	1.49	1.17	17.7	1.46	86.56	53.04	137.04	115.83	842.06	6	0
#233	1	16	5	1	0	0	0	0	0	1	0	0	0	0	0	0	0	0	0	1	1	0	11	19.2894	13.8037	1	40	40	15.7	39	0.78	2.39	1.08	0.96	15.5	1.25	111.14	66.4	157.09	105.63	-	5	0
#234	1	11	0	1	1	0	0	0	0	0	0	0	0	0	0	0	0	0	0	1	0	0	8	16.8617	14.2626	1	97	47	33.6	29.5					20.8	1.78	283.74	118.5	160.8	128.04	2190.5	8	1
#235	0	25	6	1	0	0	0	0	0	1	0	0	0	0	0	0	0	0	0	1	1	0	12	17.5781	14.2857	1	14	25	8.6	36	0.98	2.78	0.93	1.4	15.2	1.2						5	0
#236	1	28	9	0	1	0	0	0	0	1	0	0	0	0	0	0	0	0	0	1	1	0		16.901	14.3082	1	22	25	25.5	40	0.75	4.25	1.56	2.35	14	1.08	97.7	72.14	87.04	87.41	-	5	0
#237	0	18	1	1	1	0	0	0	0	1	0	0	0	0	0	0	0	0	0	0	1	0		18.3655	14.7619	1	89	85	9.7	43	0.84	3.51	1.25	1.88	13.9	1.08	55.7	55.39	100.1	91.83	4366.2	5	0
#238	1	26	6	1	0	0	0	0	0	1	0	0	0	0	0	0	0	0	0	1	1	0	11	16.6531	15.2397	1	28	36	9.2	44.3	0.92	4.17	1.54	2.21	14.5	1.14	26.56	46.69		126.61	690.3	5	0
#239	1	31	1	1	1	0	0	1	0	1	0	0	0	0	0	0	0	0	0	1	1	1	11	22.2041	15.4116	1	30	12	23.3	40.1	0.7	3.89	1.32	2.25	15.7	1.22	72.65	71.99	31.48	115.47	-	5	0
#240	0	54	1	1	0	0	0	0	0	1	0	0	0	0	0	0	0	0	0	0	0	0		25.3906	15.5963	1	25.9	22.9	15.3	43.1	1.63	5.89	1.82	3.33	14.3	1.1	393.26	70.95	67.28	111.71		5	0
#241	0	32	6	1	0	0	0	0	0	1	0	0	0	0	0	0	0	0	0	1	1	0	11	19.2277	15.7424	1	25	23	9.9	38	0.69	2.66	1.11	1.24	16.9	1.38	66.75	61.13	73.29	111.51	-	5	0
#242	1	19	0	1	0	0	0	0	0	1	0	0	0	0	0	0	0	0	0	1	1	1	10	20.4491	15.8203	1	20	18	21.7	45.6	0.58	3.35	1.54	1.55	14.4	1.15	166.38	64.78	24.21	103.85	2815.44	5	0
#243	0	16	0	1	1	0	0	0	0	1	0	0	0	0	0	0	0	0	0	1	1	0		19.1111	15.9292	1	46	17	7.4	41	1.18	2.78	0.99	1.25	13.7	1.07	68.5	52.96	116.41	102.26	-	5	0
#244	0	40	0	1	1	0	0	0	0	1	1	0	1	0	0	0	0	0	0	1	0	0	9		16.0183	1	33	29	30.9	37	0.61	2.48	0.88	1.32	20.5	1.76	485.12	63.47	148.23	145.3	-	8	1
#245	0	24	6	1	0	0	0	0	0	0	0	0	0	0	0	0	0	0	0	1	1	0	13	23.4221	16.1473	1	18	8	13.6	39.7	0.72	2.97	0.96	1.68	13.9	1.06	46.34	62.28	78.09	106.27	108.2	5	0
#246	1	15	0	0	1	0	0	0	0	1	0	0	0	0	0	0	0	0	0	1	0	0	13	22.5309	16.3265	1	38	46	8.6	33.4	0.7	3.47	1.43	1.72	17.4	1.47	236.26	95.65	25.39	112.62	1235.77	7	1
#247	0	48	11	0	0	0	0	0	0	1	0	0	0	0	0	0	0	0	0	1	0	0	10	20	16.5049	1	59	41	13.4	44.3	2.03	4.15	0.87	2.36	15	1.2	78.39	60.38	42.39	103.74		5	0
#248	0	35	18	1	1	0	0	0	0	1	1	0	1	0	0	0	0	0	1	1	1	0	11	19.487	16.6102	1	41	15	29.2	35	0.64	2.31	0.78	1.43	17.3	1.41	179.57	98.06	115.33	129.71	-	8	1
#249	1	30	2	1	1	0	0	1	0	1	1	0	1	0	0	0	0	0	0	1	1	0	13	20.0692	16.8421	1	28	27	36.6	40					18.1	1.5	127.52	61.83	47.78	92.03	-	8	1
#250	0	16	0	0	1	0	0	0	0	1	0	0	0	0	0	0	0	0	0	1	1	0	11	21.2585	16.8942	1	28	9	7.3	37	0.56	2.46	1.09	1.12	16.3	1.32	156.27	61.02	106.95	116.09	888.83	5	0
#251	0	26	10	1	0	0	0	0	0	1	0	0	0	0	0	0	0	0	0	1	1	0	13	18.5911	17.5641	1	32	25	10.5	38.3	0.69	3.93	1.37	2.25	14.2	1.1	68.52	55.97	57.88	103.46	2407.2	5	0
#252	1	17	1	1	0	0	0	0	0	1	1	0	0	0	0	0	0	0	1	1	1	0		18.3655	17.7243	1	5	23	38.4	36	0.5	3.83	1.53	2.07	17.1	1.38	103.23	69.95	116.14	118.07		7	1
#253	1	15	2	1	0	0	0	0	0	0	0	0	0	0	0	0	0	0	0	0	0	0		17.3405	17.7453	1	20	9	24.5	44	0.98	3.73	1.22	2.06	14.6	1.14	18.49	40.83	91.24	104.34	2695.52	5	0
#254	1	23	0	1	1	0	0	1	0	1	0	0	0	0	0	0	0	0	0	0	1	0	11	18.9388	17.8947	1	26	12	7.2	39.6	0.9	4.94	1.48	3.05	13.5	1.02	52.36	47.13		119.24	-	5	0
#255	0	25	0	0	1	0	0	0	0	0	0	0	0	0	0	0	0	0	0	1	1	0	12	15.5817	17.9204	1	40	44	8.7	45.3	0.4	3.2	1.33	1.69	14.1	1.1	141.42	55.55	64.54	106.5	1927.27	5	0
#256	0	36	6	0	0	0	0	0	0	1	0	0	0	0	0	0	0	0	0	1	1	0	10	19.5556	18.0233	1	69	29	18.2	43	0.7	3.45	1.13	2	15	1.18	328.93	78.24	83.1	114.75	-	5	0
#257	1	21	0	1	1	0	0	0	0	1	0	0	0	0	0	0	0	0	0	0	1	0		19.0311	18.0233	1	19	35	8.6	36.9	0.53	3.73	1.61	1.88	16.1	1.3	61.35	53.75	80.9	91.8	239.97	5	0
#258	0	19	1	0	1	0	0	0	0	1	1	0	1	0	0	0	0	0	0	1	0	0	8	30.0408	18.5185	1	54	9	44.4	25	0.59	3.2	0.7	2.23	22.4	1.95	245.45	81.32	106.36	105.76	？	11	1
#259	1	7	0	1	1	0	0	0	0	1	0	0	0	0	0	0	0	0	0	1	1	0	12	20.9275	18.5366	1	35	29	18	38	0.81	3.64	1.32	1.95	15.6	1.26	148.03	82.42	179.84	86.87	-	5	0
#260	1	53	0	0	1	0	0	0	0	1	0	0	0	0	0	0	0	0	0	0	1	0	10	23.8281	18.6084	1	28	14	11.6	32.3	1.06	3.51	0.81	2.22	13	0.97	105.33	84.81	257.69	118.87	956.75	6	0
#261	1	21	3	1	0	0	0	0	0	1	0	0	0	0	0	0	0	0	0	1	1	0	13	19.708	18.6335	1	81	57	11.5	42	0.52	2.9	1.35	1.31	15.5	1.22	100.99	57.68	81.51	106.62		5	0
#262	1	29	2	1	0	0	0	0	0	1	0	0	0	0	0	0	0	0	0	0	1	0	9	18.6851	19.0283	1	19	48	5.4	43	1.16	3.6	1.38	1.69			68.2	51.18	87.02	107.12
#263	0	28	2	1	0	0	0	0	0	1	0	0	0	0	0	0	0	0	0	1	1	0	10	17.9688	19.0355	1	39	63	7.6	36.2	0.73	2.81	1.35	1.13	13.9	1.08	347.36	57.43	112.2	95.77	226.1	5	0
#264	1	19	19	1	0	0	0	0	0	1	0	0	0	0	0	0	0	0	0	1	0	0	9	21.2245	19.1964	1	41	38	16.8	37	0.96	4.09	1.6	2.05	18.1	1.49	81.11	68.06	86.34	107.42	-	6	0
#265	1	30	7	0	1	0	0	0	0	1	0	0	0	0	0	0	0	0	0	1	1	1	11	18.6122	19.3336	1	66	49	10.1	42.6	1.65	4.88	1.17	2.96	12.4	0.93	269.93	83.23	43.27	186.33		5	0
#266	1	24	0	1	1	0	0	0	0	1	0	0	0	0	0	0	0	0	0	1	1	0	16	19.721	19.4915	1	26	25	15.7	45.7	0.51	3.49	1.27	1.99	15.2	1.21	86.28	39.58	102.21	107.26	211.69	5	0
#267	0	32	5	1	0	0	0	0	0	0	0	0	0	0	0	0	0	0	0	0	1	1			19.5021	1	24	34	6.3	36	1.8	4.32	1.28	2.22	13.4	1.03	41.76	66.63	58.97	140.17	293.86	5	0
#268	1	20	4	1	1	0	0	1	0	1	0	0	0	0	0	0	0	0	0	1	1	0		21.2245	19.9413	1	29	74	14.3	41	0.56	2.73	0.99	1.49	15.6	1.25	89.45	54.67	87.69	99.1		5	0
#269	0	20	1	1	1	0	0	0	0	1	0	0	0	0	0	0	0	0	0	1	1	0	10	18.4265	20.0957	1	22	30	16.9	42	1.1	3.18	0.97	1.71	16.5	1.32	54.85	72.06	98.95	110.01		5	0
#270	1	33	1	0	1	0	0	0	0	1	0	0	0	0	0	0	0	0	0	1	0	0	13	24.1672	20.2198	1	27	28	8.8	44.1	1.28	4.06	1.24	2.24	14.6	1.13	73.93	50.71	34.08	42.05		5	0
#271	0	43	4	1	0	0	0	0	0	1	0	0	0	0	0	0	0	0	0	0	1	0		28.578	20.323	1	24	19	13	36	0.76	4.04	1.22	2.47	15.1	1.19	270.18	80.38	149.63	135.65	959.81	5	0
#272	0	17	1	1	0	0	0	0	0	1	0	0	0	0	0	0	0	0	0	0	1	0	9	16.0494	20.5438	1	22	30	11	38	1.47	4.38	1.16	2.55	14.5	1.14	39.79	49.43	82.67	133.79	-	5	0
#273	1	46	12	1	0	0	0	0	0	1	0	0	0	0	0	0	0	0	0	1	0	0	10	23.8754	20.6799	1	31	31	21.7	38.5	2.27	5.54	1.17	3.34	14.6	1.16	476.77	84.39	75.57	103.09	1735.83	5	0
#274	0	51	0	0	1	0	0	0	0	1	0	0	0	0	0	0	0	0	0	1	1	1	14	19.8413	20.7207	1	19	14	9.3	34.9	0.92	5.33	1.19	3.72	15.1	1.2	120.96	75.5	71.31	104.24	2040.75	6	0
#275	0	21	11	0	1	0	0	0	0	0	0	0	0	0	0	0	0	0	0	0	1	0	9	17.0874	20.7569	1	22	32	9.8	40	0.72	3.8	1.72	1.75	13.2	1.02	8.45	49.04	64.49	93.27	-	5	0
#276	0	49	0	0	0	0	0	0	0	1	1	0	0	0	0	0	0	0	1	1	0	0	7	18.2563	20.9026	1	36.2	48.2	17.2	32.4	1.04	2.41	0.81	1.13	16.7	1.37	245.16	111.98	137.63	120.05	0	6	0
#277	0	22	0	1	0	0	0	0	0	1	0	0	0	0	0	0	0	0	0	1	0	1	11	18.5901	21.0667	1	52	22	10.1	35.4					14.4	1.1	54.31	63.65	78.12	92.25	568.68	5	0
#278	1	20	8	1	1	0	0	0	0	1	0	0	0	0	0	0	0	0	0	0	1	0	9	26.5731	21.3656	1	77	68	8	49	6.27	4.9	0.96	2.13	11.8	0.89	33.31	41.86	60.88	108.25	-	5	0
#279	1	29	4	1	1	0	0	0	0	1	0	0	0	0	0	0	0	0	0	1	1	1	9	20.7612	21.5347	1	71	98	9.6	42	0.94	3.38	1.04	1.91	14.2	1.11	24.38	49.33	68.49	81.05	247.65	5	0
#280	0	22	7	1	0	0	0	0	0	1	0	0	0	0	0	0	0	0	0	0	1	0	9	17.9688	21.5892	1	18	12	15.3	41.4	0.47	4.26	1.56	2.49	12.7	0.98	60.13	54.39	67.5	106.55	-	5	0
#281	1	48	30	1	0	0	0	0	0	1	1	0	0	0	0	0	0	0	1	1	0	0	17.8	25.6055	21.6019	1	37	69	9.4	41	0.54	4.42	1.2	2.97	15.8	1.25	73.33	54.27	89.69	103.43	133.73	5	0
#282	0	14	0	1	1	0	0	0	0	1	0	0	0	0	0	0	0	0	0	1	1	1	11		21.9457	1	94	35	15.1	49.6	0.69	3.87	1.5	2.06	14.1	1.1	68.65	62.2	78.93	107.06	1838.4	5	0
#283	0	11	0	0	0	0	0	0	0	0	0	0	0	0	0	0	0	0	0	0	1	0	10	15.3846	22.5287	1	32	14	11.9	35							73.15	75.45	140.26	122.47
#284	1	25	9	1	0	0	0	0	0	1	1	0	0	0	0	0	0	0	1	1	0	0	12	17.2111	22.5839	1	93	80	36.8	33					17.8	1.49					？	8	1
#285	1	38	0	0	0	0	0	0	0	0	0	0	0	0	0	0	0	0	0	1	0	0	10	22.7732	22.8148	1	27	43	18.5	43.9	1.95	4.27	0.92	2.46	13.2	0.99	32.57	60.97	49.49	97.44	113.73	5	0
#286	1	30	11	0	0	0	0	0	0	1	0	0	0	0	0	0	0	0	0	1	0	0	12	22.0243	22.8346	1	83	90	43.3	30.2	1.35	5.94	0.54	4.79	19.7	1.67	818.89	94.66	161.77	126.17	3155.99	9	1
#287	1	16	4	1	1	0	0	0	0	0	0	0	0	0	0	0	0	0	0	0	1	0		15.173	22.8395	1	27	22	8.3	39					14.4	1.11	53.18	52.17	86.38	125.3		5	0
#288	1	24	1	0	1	0	0	0	0	0	0	0	0	0	0	0	0	0	0	0	1	0			23.2441	1	25	46	13.1	42	0.81	3.39	1.16	1.86	14.6	1.16	108.9	66.2	91.71	108.69	-	5	0
#289	0	43	3	1	0	1	0	0	0	1	0	0	0	0	0	0	0	0	0	0	1	1			23.58	1	18	14	7.1	36	0.52	2.5	1.01	1.25	13.2	1	89.16	55.32	71.2	110.79	357.45	5	0
#290	1	18	0	1	1	0	0	0	0	1	0	0	0	0	0	0	0	0	0	1	1	0		24.281	23.6364	1	23.3	25.2	11.1	38.1	0.63	3.84	1.29	2.26
#291	1	35	9	1	0	0	0	1	0	0	0	0	0	0	0	0	0	0	0	0	1	0		21.3839	23.6473	1	24	9	14.8	34	0.82	3.28	1.2	1.71	14.5	1.15	30.36	52.18	70.68	134.38	-	6	0
#292	0	30	4	1	1	0	0	0	0	1	1	0	1	0	0	0	1	1	0	0	1	0		22.0317	23.7052	1	31	67	42.2	26	1.33	3.28	0.99	1.69	18.8	1.56					-	11	1
#293	1	24	1	1	0	0	0	1	0	1	1	0	1	0	0	0	0	0	0	1	0	0	14	18.4661	24.0458	1	40	55	19.5	24.9	0.88	2.8	0.75	1.65	21.5	1.9	532.43	149.57	59.03	165.5		10	1
#294	1	32	20	0	1	0	0	0	0	1	0	0	0	0	0	0	0	0	0	1	0	1	9	25.6544	24.0708	1	21	4	13.1	33	0.78	3.12	1.3	1.47	14.5	1.13	45.37	50.98	81.3	110.16	1460.62	6	0
#295	0	27	9	1	1	0	0	0	0	1	0	0	0	0	0	0	0	0	0	1	1	0	11	27.3438	24.0838	1	21	12	24.5	40	0.68	3.69	1.5	1.88	13.1	1.01	63.09	53.5	78.58	82.93	245.51	5	0
#296	1	24	2	1	0	0	0	0	0	1	0	0	0	0	0	0	0	0	0	1	1	0	9	15.7808	24.0909	1	18	16	12.8	39.7	0.53	3.34	0.87	2.23	15.2	1.19	66.13	52.1	62.15	95.3	11.78	5	0
#297	0	19	2	0	0	0	0	0	0	1	0	0	0	0	0	0	0	0	0	1	1	0	10	26.6436	24.2604	1	12	23	21.5	25					20.8	1.77	188.05	74.68	94.28	88.67		9	1
#298	1	26	2	1	1	0	0	0	0	1	0	0	0	0	0	0	0	0	0	1	1	0			24.4161	1	45	40	8.5	39	0.86	4.3	1.34	2.57	14.2	1.09						5	0
#299	0	23	7	1	0	0	0	0	0	1	0	0	0	0	0	0	0	0	0	0	1	0		20.9572	24.4813	1	37	32	9.5	43	1.29	4.71	1.24	2.88	12.6	0.94	25.78	48.36	72.15	113.13	33.67	5	0
#300	0	19	8	1	0	0	0	0	0	1	0	0	0	0	0	0	0	0	0	0	0	0	8		24.5066	1	10	5	17.4	39					14	1.08	22.47	51.27	69.77	92.9	-	5	0
#301	1	30	17	1	0	0	0	1	0	1	0	0	0	0	0	0	0	0	0	0	1	0	10	20.9042	24.5652	1	33	55	10.9	35.5							234.79	63.87	71	106.87
#302	1	51	2	1	1	0	0	0	0	1	0	0	0	0	0	0	0	0	0	0	1	0	12	24.5675	24.6594	1	61	25	15.3	46.1	1.9	4.99	1.04	3.09	13.3	1.01	46.09	57.67	41	122.75		5	0
#303	0	20	3	0	0	0	0	0	0	1	0	0	0	0	0	0	0	0	0	1	1	0	10	18.5547	25.3112	1	24	29	15.7	41	0.73	3.84	1.4	2.11	14.2	1.11					370.31	5	0
#304	1	28	2	1	0	0	0	1	0	1	0	0	0	0	0	0	0	0	0	1	0	0	9	20.9573	25.4818	1	23	25	11.2	45	1.49	3.7	0.88	2.14	14	1.09	118.46	55.51	72.58	114.09	156.05	5	0
#305	0	21	0	1	0	0	0	0	0	1	0	0	0	0	0	0	0	0	0	1	1	0	11	18.6851	25.5255	1	34	55	18.8	41					13	1	56.95	68.77	106.74	105.07	-	5	0
#306	1	32	0	1	1	0	0	0	1	1	0	0	0	0	0	0	0	0	0	1	0	0	12	19.2901	25.5495	1	34	49	18.8	39	0.97	3.63	1.32	1.87	14.9	1.17	139.37	75.39	136.1	116.68	1004.46	5	0
#307	0	30	2	1	0	0	0	0	0	1	0	0	0	0	0	0	0	0	0	0	0	0		24.3824	25.5656	1	13	10	10.7	46.1	0.72	3.5	1.42	1.75	12.7	0.94	22.23	29.68		79.84	370.62	5	0
#308	1	33	10	1	0	0	0	0	0	1	0	0	0	0	0	0	0	0	0	0	1	0		17.301	25.5725	1	19	14	14.3	43	0.81	6.22	1.86	3.99	14.3	1.1	32.46	56.54	63.98	99.47	632.04	5	0
#309	0	24	4	1	0	0	0	0	0	1	0	0	0	0	0	0	0	0	0	0	1	0	10	18.9619	25.5754	1	24	18	9.5	45	1.33	3.06	1.25	1.21	13.8	1.04	68.34	59.26	28.54	150.62	15.74	5	0
#310	1	25	0	1	1	0	0	0	0	0	0	0	0	0	0	0	0	0	0	1	1	0	9	22.7244	25.6219	1	20	11	28.5	43.2	0.46	3.63	1.38	2.04	14.7	1.14	52.59	65.18	94.38	112.92	102.6	5	0
#311	0	42	16	1	1	0	0	0	0	1	0	0	0	0	0	0	0	0	0	1	1	0	11	20.1348	25.6757	1	38	40	17.5	35.4	0.41	3.74	1.44	2.11	15.7	1.26	101.47	63.43	43.27	95.89	997.09	5	0
#312	1	18	8	1	0	0	0	0	0	0	0	0	0	0	0	0	0	0	0	0	0	0	9	29.685	25.8597	1	24	42	7.9	38	1.31	4.48	1.11	2.77	13.2	1.02	27.46	57.03	118.6	105.85	-	5	0
#313	0	22	14	0	0	0	0	0	0	1	1	0	1	0	0	0	0	0	1	1	1	1	10	22.6003	25.9016	1	26	32	6.6	42	0.56	3	0.89	1.86	14.7	1.15	90.25	65.55	53.2	104.68	-	6	0
#314	0	16	6	1	0	0	0	0	0	1	0	0	0	0	0	0	0	0	0	0	0	0	8	21.7198	26.0591	1	32	19	22.1	38	1.02	2.95	1.1	1.39	14.7	1.17	77.28	53.73	143.38	115.09	-	5	0
#315	1	34	10	1	0	0	0	0	0	1	0	0	0	0	0	0	0	0	0	1	1	0	10	17.5064	26.2605	1	21	23	25.4	45	1.13	2.76	1.16	1.09	14.6	1.16	34.98	41.42	74.29	60.67	-	5	0
